# Supplementary material for: A hybrid bipy–NHC ligand for the construction of group 11 mixed-metal bimetallic complexes
Source: Royal Society of Chemistry journal article supplement (doi:10.1039/d1ra06581e), 2021-01-01
Supplement: d1ra06581e1.pdf [file d1ra06581e1.pdf]

## Supplementary material.

# A Hybrid Bipy-NHC Ligand for the Construction of Group 11 Mixed-Metal Bimetallic Complexes

Benson M. Kariuki,<sup>a</sup> James A. Platts<sup>a</sup> and Paul D. Newman<sup>\*b</sup>

<sup>†</sup>School of Chemistry, Cardiff University, Cardiff, CF10 3AT, UK.

<sup>‡</sup>Cardiff Catalysis Institute, School of Chemistry, Cardiff University, Cardiff, CF10 3AT, UK.

## Contents

|                                                                                                                                                            |     |
|------------------------------------------------------------------------------------------------------------------------------------------------------------|-----|
| NMR and MS data:                                                                                                                                           | S2  |
| [Au( $\kappa$ -C-L) <sub>2</sub> ]BF <sub>4</sub> , <b>1</b>                                                                                               | S2  |
| [AuAg( $\kappa$ -C <sup>Au</sup> , $\kappa$ <sup>2</sup> -N,N' <sup>Ag</sup> - <b>1</b> ) <sub>2</sub> ](BF <sub>4</sub> ) <sub>2</sub> , <b>2a</b>        | S5  |
| [AuCu( $\kappa$ -C <sup>Au</sup> , $\kappa$ <sup>2</sup> -N,N' <sup>Cu</sup> - <b>1</b> ) <sub>2</sub> ](BF <sub>4</sub> ) <sub>2</sub> , <b>2b</b>        | S7  |
| [AuAu'( $\kappa$ -C,N <sup>Au,Au'</sup> , $\kappa$ <sup>1</sup> -N <sup>Au,Au'</sup> - <b>1</b> ) <sub>2</sub> ](BF <sub>4</sub> ) <sub>2</sub> , <b>3</b> | S11 |
| Theoretical calculations of metallophilic interactions                                                                                                     | S12 |
| Crystallographic data                                                                                                                                      | S15 |
| References.....                                                                                                                                            | S17 |

[Au( $\kappa$ -C-L)<sub>2</sub>]BF<sub>4</sub>, **1**.

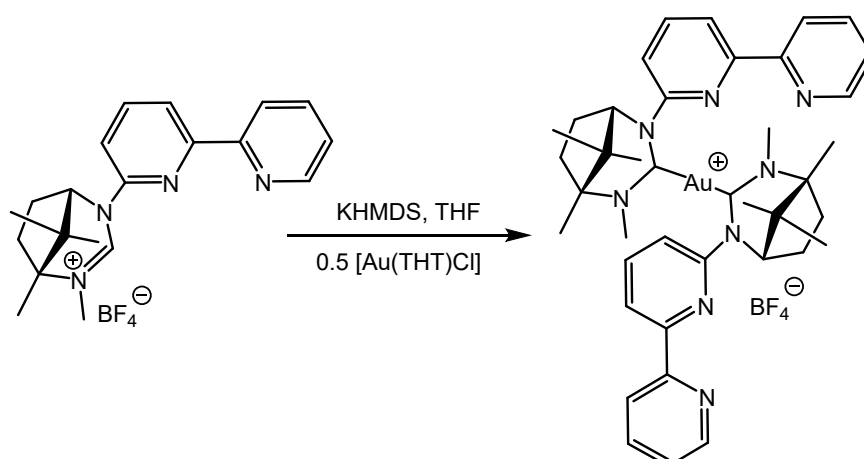

To a stirred suspension of  $[\text{LH}]\text{BF}_4$  (100 mg,  $2.45 \times 10^{-4}$  mol) in THF (10 ml) at  $-40^\circ\text{C}$  was added, as a solid, KHMDS (59 mg,  $2.94 \times 10^{-4}$  mol). The addition of the base caused the salt to dissolve to give an orange solution. After one hour at  $-40^\circ\text{C}$ , solid  $[\text{Au}(\text{THT})\text{Cl}]$  (39 mg,  $1.22 \times 10^{-4}$  mol) was added and the stirred solution allowed to warm slowly to RT in the absence of light. The volatiles were removed in vacuo and the resultant solid dissolved in  $\text{CH}_2\text{Cl}_2$  (5 ml) and filtered through a fibreglass filter. After removal of volatiles the residue was crystallised from acetone by vapour-diffusion of pentane to give colourless crystals. Yield = 88 mg (78%).

$^1\text{H}$  ( $d_6$ -acetone, 400 MHz): 8.65 (ddd, 4.7, 1.7, 0.9 Hz, 1H), 8.40 (dt, 8.0, 0.9 Hz, 1H), 8.19 (dd, 7.8, 0.8 Hz, 1H), 7.94 (td, 7.7, 1.8 Hz, 1H), 7.80 (t, 7.8 Hz, 1H), 7.42 (ddd, 7.6, 6.0, 1.2 Hz, 1H), 7.24 (dd, 7.9, 0.8 Hz, 1H), 3.89 (d, 5.1 Hz, 1H), 3.29 (s, 3H), 2.35-1.80 (m, 4H), 1.26 (s, 3H), 1.05 (s, 3H), 0.94 (s, 3H) ppm.  $^{13}\text{C}\{^1\text{H}\}$  ( $\text{CDCl}_3$ , 125 MHz): 196.2 (NCN), 154.2 (C), 152.5 (C), 152.4 (C), 146.8 (CH), 136.7 (CH), 134.6 (CH), 121.8 (CH), 118.6 (CH), 117.3 (CH), 116.9 (CH), 68.6 (C), 66.8 (CH), 39.0 (C), 38.2 ( $\text{CH}_2$ ), 35.9 ( $\text{CH}_3$ ), 28.7 ( $\text{CH}_2$ ), 19.6 ( $\text{CH}_3$ ), 15.3 ( $\text{CH}_3$ ), 13.3 ( $\text{CH}_3$ ) ppm. HRMS (ES):  $m/z$  837.3665 (calc. 837.3667)  $[\text{M}]^+$ , 100%.

$^1\text{H}$  NMR spectrum of  $[\text{Au}(\kappa\text{-C-L})_2]\text{BF}_4$  recorded at 400 MHz in  $d_6$ -acetone.

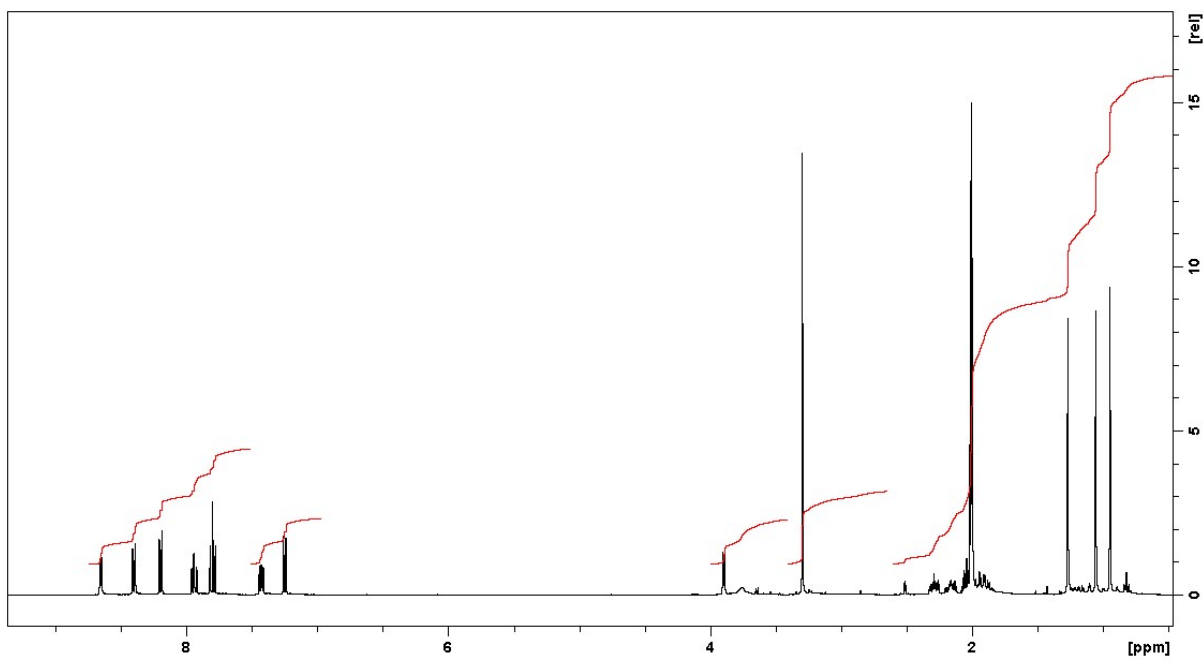

$^{13}\text{C}$  NMR spectrum of  $[\text{Au}(\kappa\text{-C-L})_2]\text{BF}_4$  recorded at 125 MHz in  $\text{CDCl}_3$ .

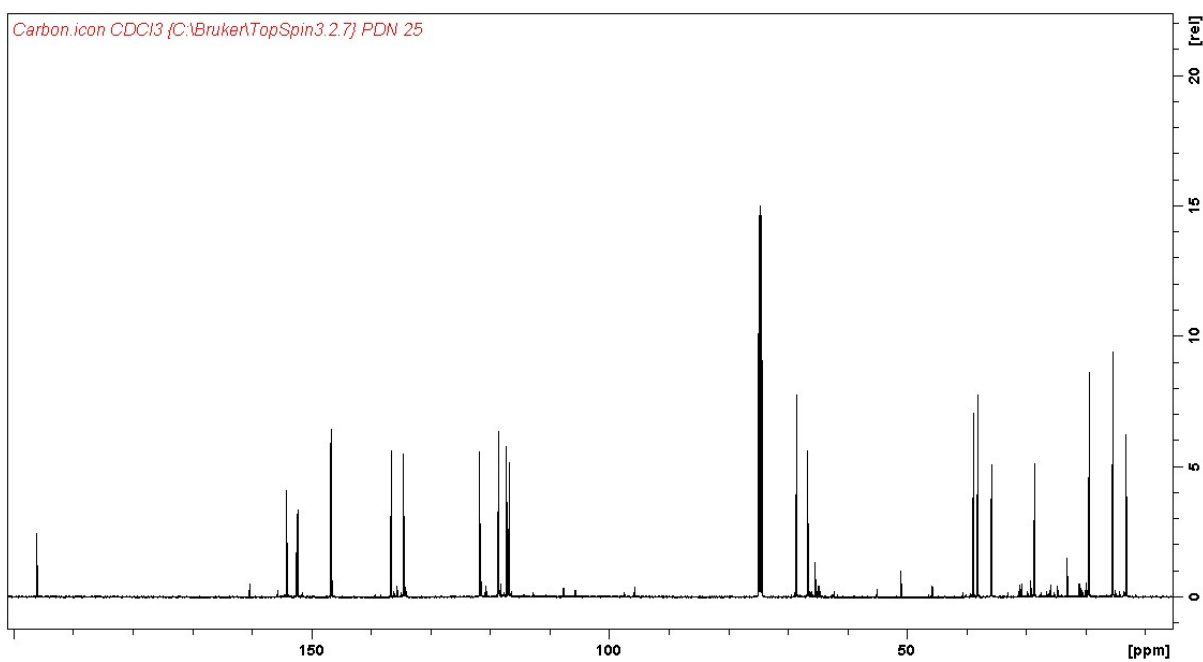

HRMS ( $\text{ES}^+$ ) spectrum of  $[\text{Au}(\kappa\text{-C-L})_2]\text{BF}_4$ .

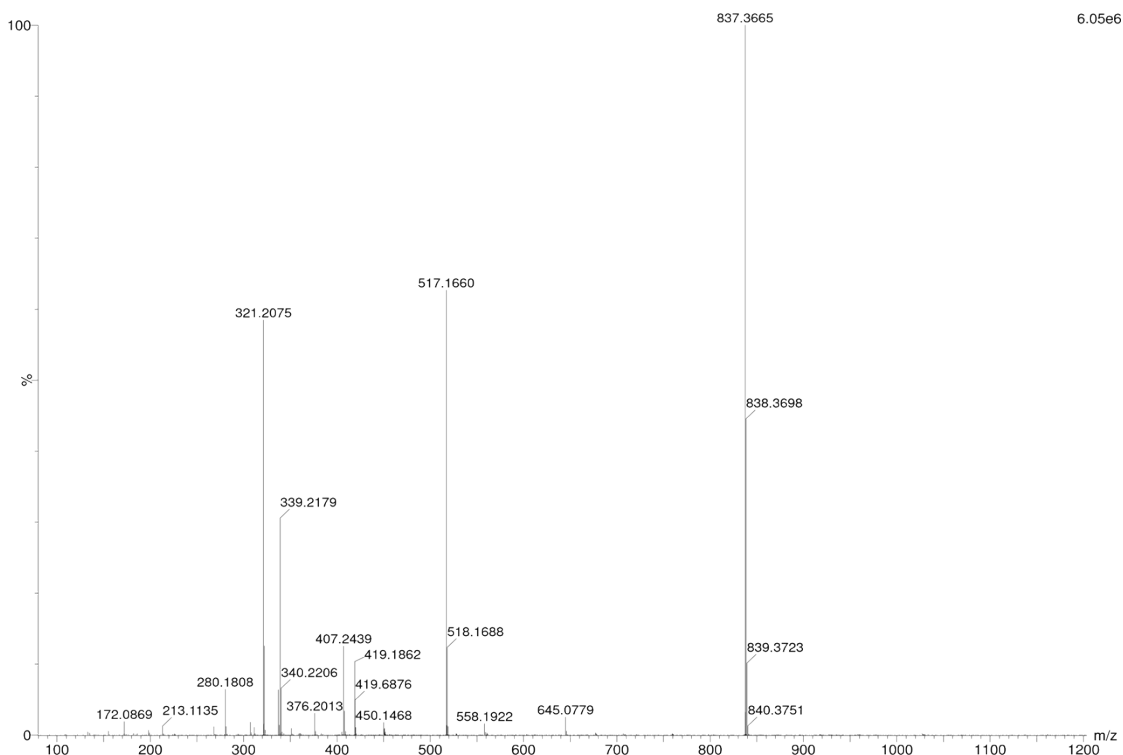

### Single Mass Analysis

Tolerance = 5.0 PPM / DBE: min = -1.5, max = 200.0

Element prediction: Off

Number of isotope peaks used for i-FIT = 3

Monoisotopic Mass, Odd and Even Electron Ions

15 formula(e) evaluated with 1 results within limits (up to 50 closest results for each mass)

Elements Used:

C: 0-40 H: 0-48 N: 0-8 197Au: 0-1

Minimum: -1.5  
Maximum: 5.0 5.0 200.0

| Mass     | Calc. Mass | mDa  | PPM  | DBE  | i-FIT | Norm | Conf (%) | Formula          |
|----------|------------|------|------|------|-------|------|----------|------------------|
| 837.3665 | 837.3667   | -0.2 | -0.2 | 21.5 | 346.4 | n/a  | n/a      | C40 H48 N8 197Au |

$[\text{AuAg}(\kappa\text{-C}^{\text{Au}}, \kappa^2\text{-N}, \text{N}'^{\text{Ag}}\text{-1})_2](\text{BF}_4)_2$ , **2a**.

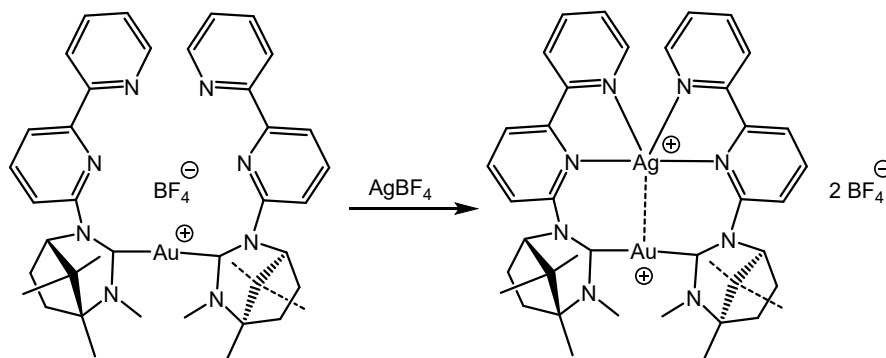

A mixture of  $[\text{Au}(\kappa\text{-C-1})_2]\text{BF}_4$  (20.0 mg,  $2.26 \times 10^{-5}$  mol) and  $\text{AgBF}_4$  (4.4 mg,  $2.26 \times 10^{-5}$  mol) were added to  $d_6$ -acetone (1.0 ml) and sonicated for ten seconds. The pale yellow solution was isolated from the grey solid and taken to dryness to yield a cream solid. Yield = 68%. Crystals suitable for analysis by single-crystal X-ray crystallography were obtained by vapour diffusion of  $\text{Et}_2\text{O}$  into a solution of the complex in acetone.  $^1\text{H}$  ( $\text{CD}_3\text{CN}$ , 400 MHz): 8.80 (br, 2H), 8.51 (d, 8.1 Hz, 2H), 8.35 (d, 7.9 Hz, 2H), 8.23 (m, 4H), 7.69 (dd, 6.9, 5.6 Hz, 2H), 7.53 (d, 7.9 Hz, 2H), 3.86 (br, 2H), 2.68 (s br, 6H), 2.20-1.60 (m br, 8H), 1.10 (s br, 9H), 1.04 (s br, 9H) ppm.  $^{13}\text{C}\{^1\text{H}\}$  ( $\text{CD}_2\text{CN}$ , 150 MHz): 198.0 (NCN), 157.4 (C), 151.9 (CH), 151.7 (C), 151.1 (CH), 142.0 (CH), 140.0 (CH), 126.2 (CH), 124.2 (CH), 122.2 (CH), 71.2 (C), 71.2 (CH), 40.8 (C), 40.2 ( $\text{CH}_2$ ), 38.2 ( $\text{CH}_3$ ), 31.4 ( $\text{CH}_2$ ), 20.7 ( $\text{CH}_3$ ), 17.4 ( $\text{CH}_3$ ), 14.6 ( $\text{CH}_3$ ) ppm. HRMS (ES):  $m/z$  473.1365  $[\text{M}]^{2+}$ , 100%.

$^1\text{H}$  NMR spectrum of  $[\text{AuAg}(\kappa\text{-C}^{\text{Au}}, \kappa^2\text{-N}, \text{N}'^{\text{Ag}}\text{-1})_2](\text{BF}_4)_2$  recorded at 400 MHz in  $\text{CD}_3\text{CN}$ .

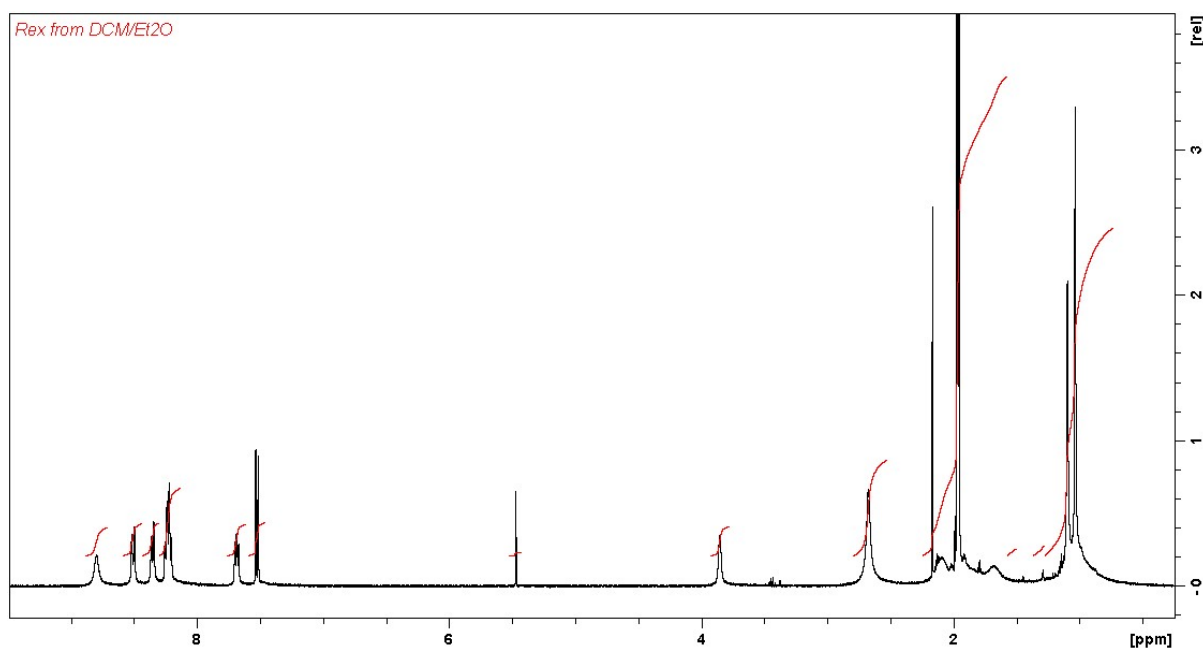

$^{13}\text{C}\{^1\text{H}\}$  NMR spectrum of  $[\text{AuAg}(\kappa\text{-C}^{\text{Au}}, \kappa^2\text{-N, N}'^{\text{Ag}}\text{-1})_2](\text{BF}_4)_2$  recorded at 150 MHz in  $\text{CD}_3\text{CN}$ .

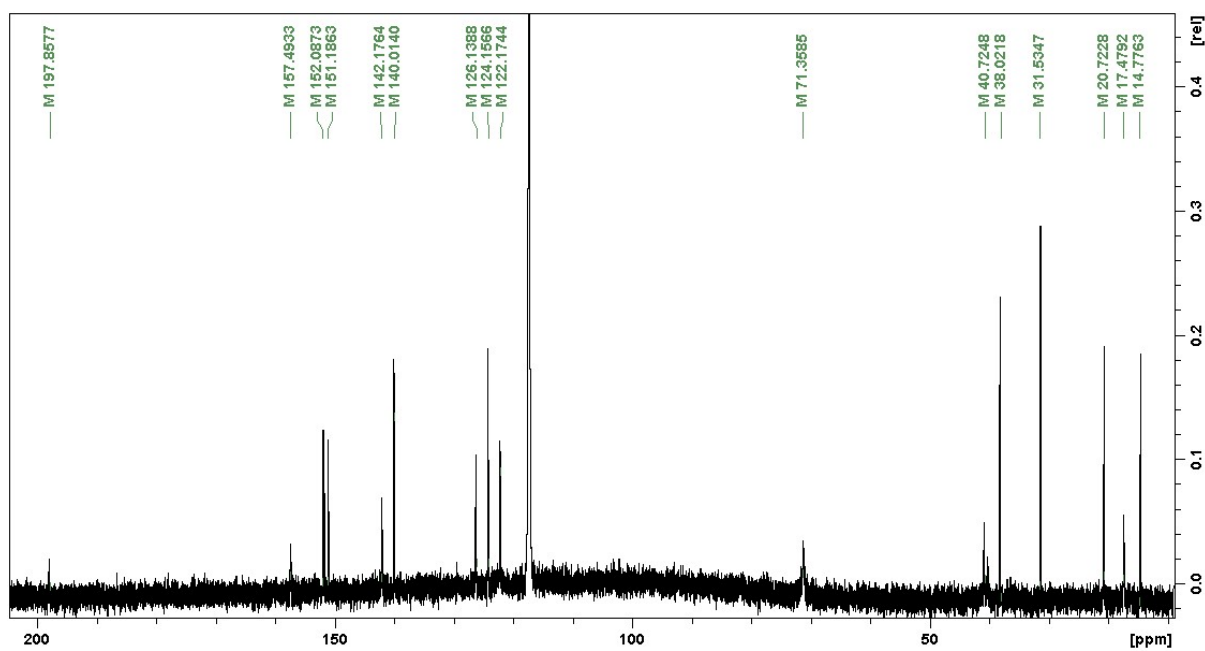

HRMS (ES<sup>+</sup>) spectrum of  $[\text{AuAg}(\kappa\text{-C}^{\text{Au}}, \kappa^2\text{-N, N}'^{\text{Ag}}\text{-1})_2](\text{BF}_4)_2$

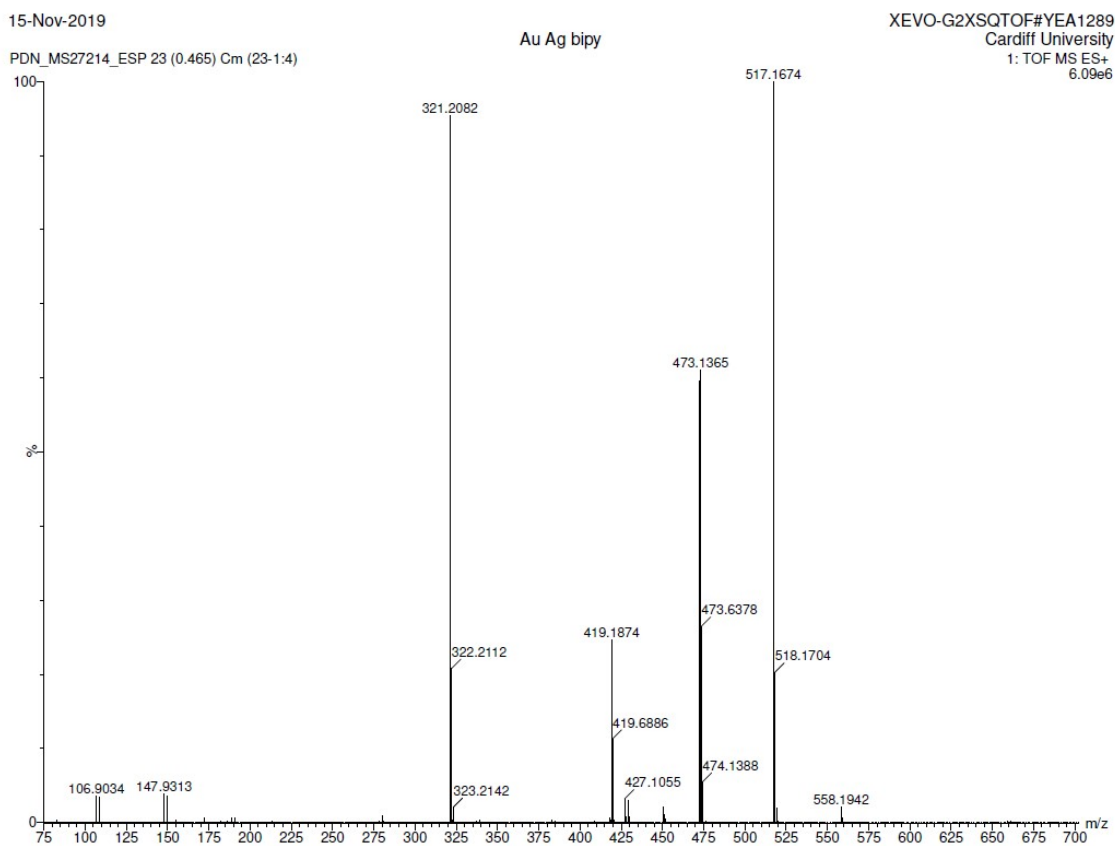

15-Nov-2019

XEVO-G2XSQTOF#YEA1289

Cardiff University

1: TOF MS ES+

3.37e12

PDN\_MS27214\_ESP (0.053) Is (1.00,1.00) C40H46AgAuN8

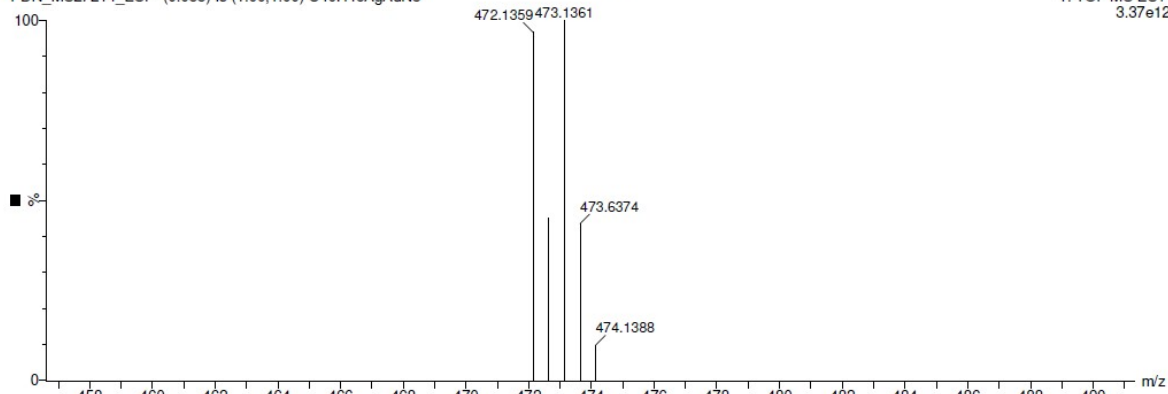

PDN\_MS27214\_ESP 23 (0.465) Cm (23-1:4)

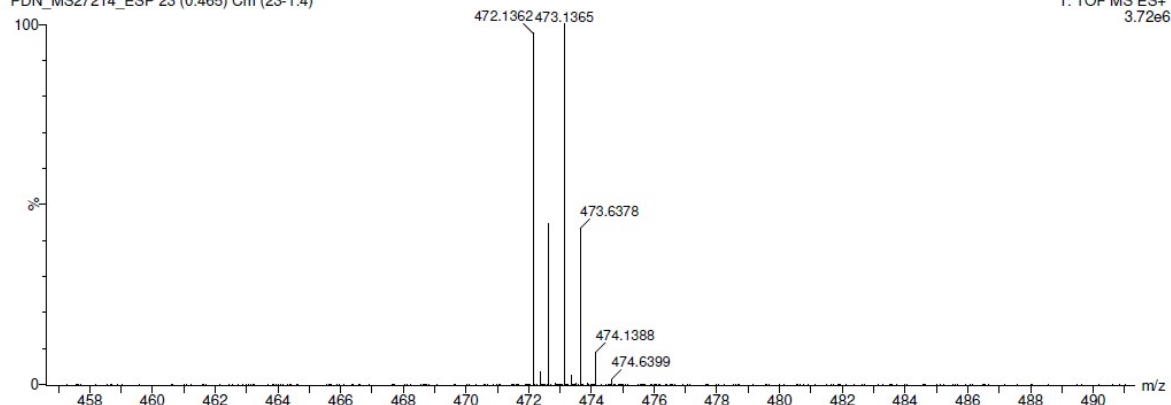

$[\text{AuCu}(\kappa\text{-C}^{\text{Au}}, \kappa^2\text{-N, N}'^{\text{Cu}}\text{-1})_2](\text{BF}_4)_2$ , **2b**.

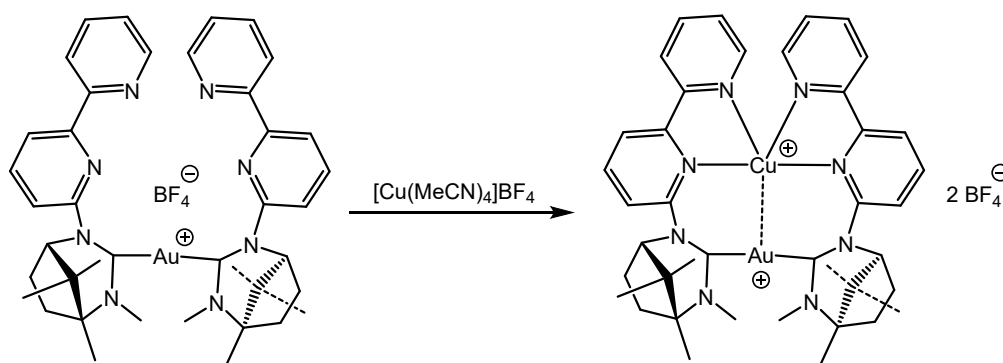

A mixture of  $[\text{Au}(\kappa\text{-C-1})_2]\text{BF}_4$  (20.0 mg,  $2.26 \times 10^{-5}$  mol) and  $[\text{Cu}(\text{MeCN})_4]\text{BF}_4$  (6.8 mg,  $2.26 \times 10^{-5}$  mol) were dissolved in acetone (1.0 ml) to give an orange-red solution which was taken to dryness to give an orange-red solid. Yield = quantitative.  $^1\text{H}$  ( $d_6$ -acetone, 400 MHz): 8.84 (dd, 5.0, 0.7 Hz, 2H), 8.69 (d, 8.2 Hz, 2H), 8.59 (d, 8.0 Hz, 2H), 8.29 (t, 8.0 Hz, 2H), 8.23 (dt, 8.0, 1.7 Hz, 2H), 7.75 (d, 8.1 Hz, 2H), 7.66 (ddd, 7.4, 5.1, 0.8 Hz, 2H), 4.14 (d, 4.6 Hz, 2H), 2.74 (s, 6H), 2.00-1.50 (m, 8H), 1.09 (s, 6H), 1.05 (s, 6H), 0.99 (s, 6H) ppm.  $^{13}\text{C}\{^1\text{H}\}$  ( $d_6$ -acetone, 100 MHz): 199.3 (NCN), 157.8 (C), 152.2 (C), 151.7 (C), 150.4 (CH), 142.8 (CH), 140.2 (CH), 127.8 (CH), 124.2 (CH), 123.7 (CH), 122.0 (CH), 71.7 (C), 71.6 (CH), 41.6 (C), 41.0 ( $\text{CH}_2$ ), 39.0 ( $\text{CH}_3$ ), 31.8 ( $\text{CH}_2$ ), 21.3 ( $\text{CH}_3$ ), 17.7 ( $\text{CH}_3$ ), 15.4 ( $\text{CH}_3$ ) ppm. HRMS (ES):  $m/z$  450.1485  $[\text{M}]^{2+}$ , 100%.

$^1\text{H}$  NMR spectrum of  $[\text{AuCu}(\kappa\text{-C}^{\text{Au}}, \kappa^2\text{-N}, \text{N}'^{\text{Cu}}\text{-1})_2](\text{BF}_4)_2$  recorded at 400 MHz in  $d_6$ -acetone.

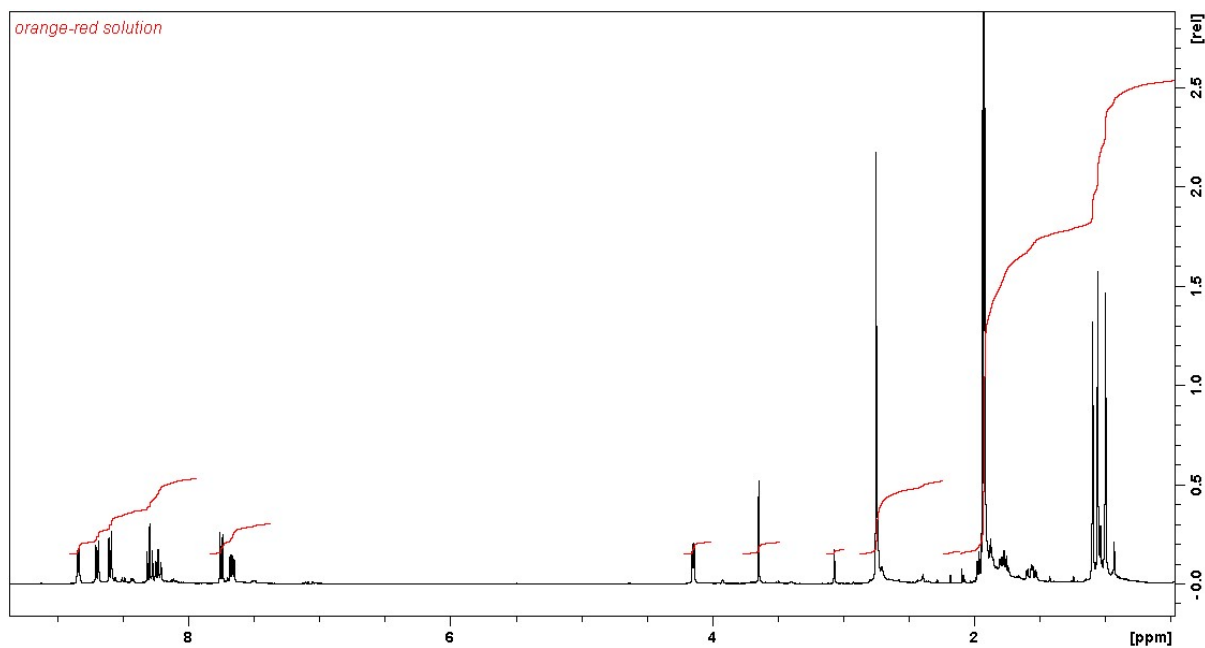

$^{13}\text{C}$  NMR spectrum of  $[\text{AuCu}(\kappa\text{-C}^{\text{Au}}, \kappa^2\text{-N}, \text{N}'^{\text{Cu}}\text{-1})_2](\text{BF}_4)_2$  recorded at 100 MHz in  $d_6$ -acetone.

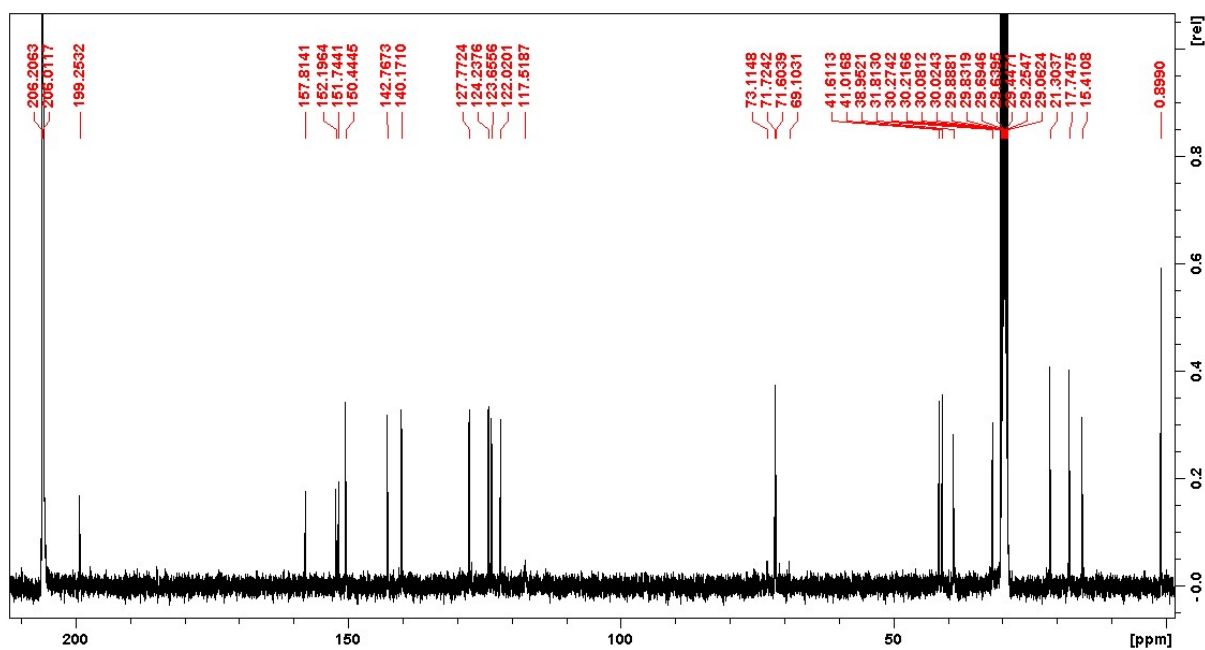

HRMS ( $\text{ES}^+$ ) spectrum of  $[\text{AuCu}(\kappa\text{-C}^{\text{Au}}, \kappa^2\text{-N}, \text{N}'^{\text{Cu}}\text{-1})_2](\text{BF}_4)_2$



11-Feb-2021

XEVO-G2XSQTOF#NotSet  
Cardiff University  
1: TOF MS ES+  
4.34e12

PDN\_MS33902\_ESP (0.053) Is (1.00,1.00) C40H46N8AuCu

CuAu

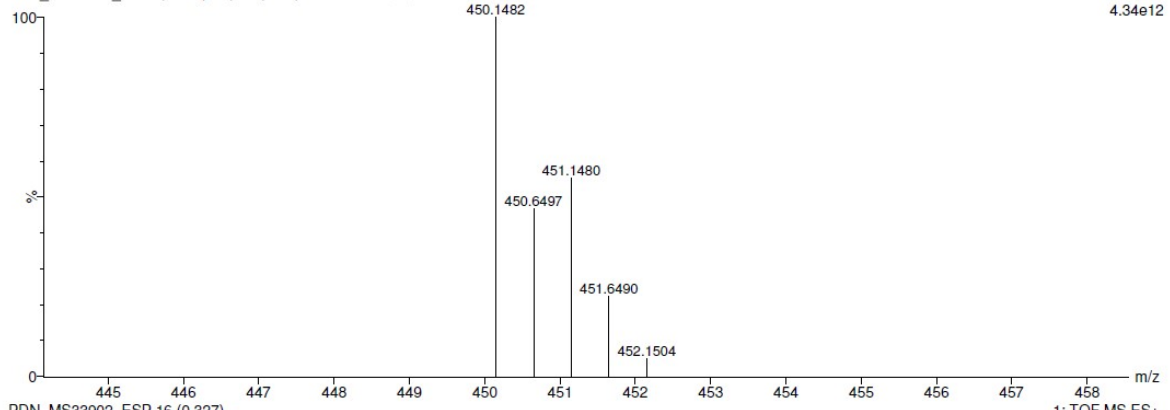

PDN\_MS33902\_ESP 16 (0.327)

1: TOF MS ES+  
1.56e7

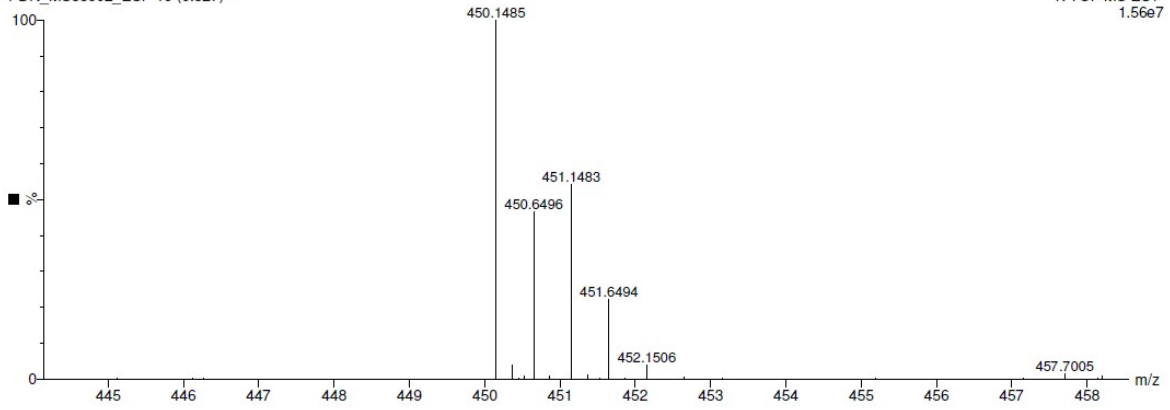

Attempted preparation of  $[\text{AuAu}(\kappa\text{-C}^{\text{Au}}, \kappa^2\text{-N, N}'^{\text{Au}}\text{-1})_2](\text{BF}_4)_2$ , **2c**.

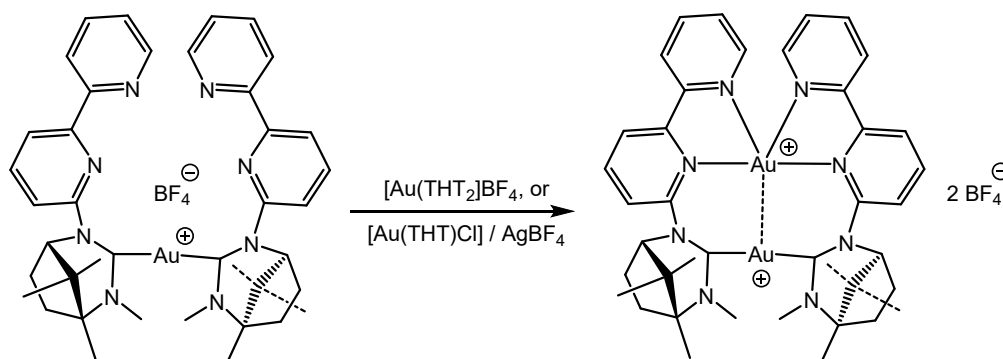

In a typical procedure, a solution of  $\text{AgBF}_4$  (12 mg,  $6.10 \times 10^{-5}$  mol) and THT (18 mg,  $1.93 \times 10^{-4}$  mol) in  $\text{CH}_2\text{Cl}_2$  (5 ml) was stirred for 2 hours in the absence of light whereupon  $[\text{Au}(\text{THT})\text{Cl}]$  (18 mg,  $5.65 \times 10^{-5}$  mol) was added as a solid. After stirring for a further 1 hour in the dark, the mixture was filtered into a stirred solution of  $[\text{Au}(\kappa\text{-C-1})_2]\text{BF}_4$  (50.0 mg,  $5.65 \times 10^{-5}$  mol) in  $\text{CH}_2\text{Cl}_2$ . After stirring for a further 1 hour in the dark, the solution was filtered and all volatiles removed in *vacuo*. The resultant tan solid was triturated with diethyl ether, filtered and dried in *vacuo*. All attempts to obtain a pure compound by recrystallisation from various solvents were unsuccessful. Only on a single occasion were a small number of crystals obtained by vapour diffusion of pentane into an acetone solution of the mixture. These proved to be  $[\text{AuAu}'(\kappa\text{-C}^{\text{Au/Au}'}, \kappa^1\text{-N}^{\text{Au/Au}'}\text{-1})_2](\text{BF}_4)_2$ , **3**. Decomposition was often observed as evidenced by the deposition of dark solids. Changes to the procedure described above included using  $\text{AgOTf}$  or  $\text{AgPF}_6$ , isolating the  $[\text{Au}(\text{THT})_2]\text{BF}_4$  before the second step (this is not recommended as this material is quite sensitive) and reversing the addition of the final step but none of these changes proved successful.

$^1\text{H}$  NMR spectrum of the solid resulting from the attempted synthesis of **2c** recorded at 400 MHz in  $\text{d}_6$ -acetone. This is the best quality sample that could be obtained.

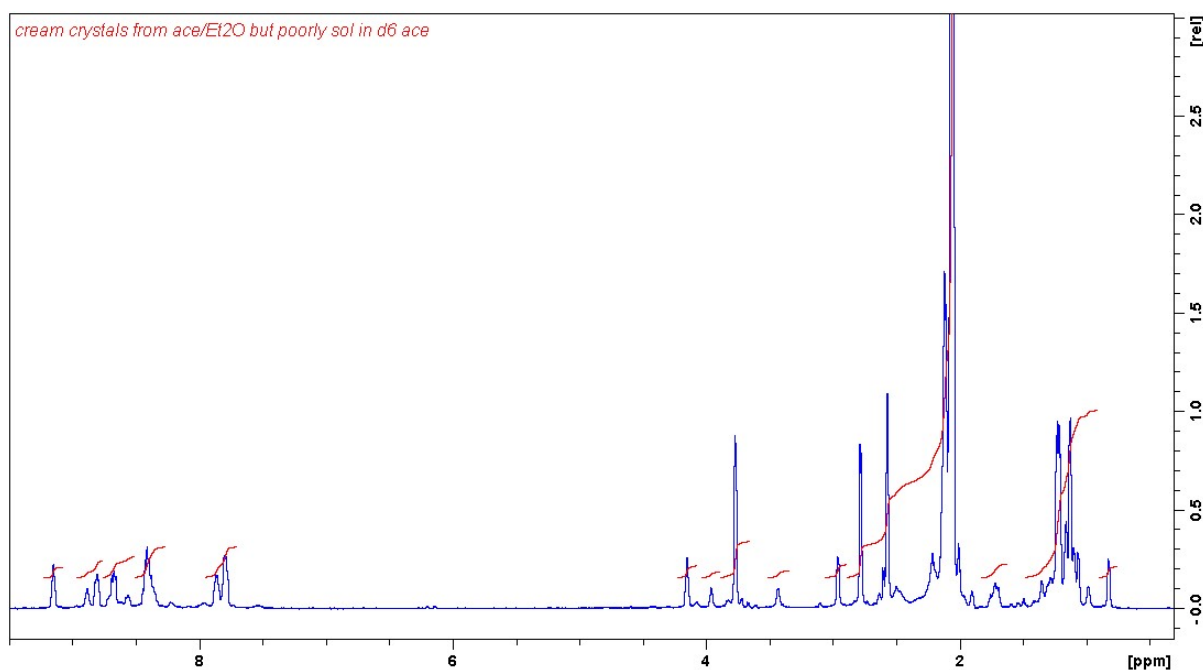

HRMS (ES<sup>+</sup>) spectrum showing the dication [AuAu'(κ-C<sup>Au,Au'</sup>,κ<sup>1-N<sup>Au,Au'</sup>-1</sup>)<sub>2</sub>]<sup>2+</sup>

05-Feb-2021

XEVO-G2XSQTOF#YEA1289  
Cardiff University  
1: TOF MS ES+  
6.28e12

PDN\_MS33846\_ESP (0.209) Is (1.00,1.00) C40H46N8Au2

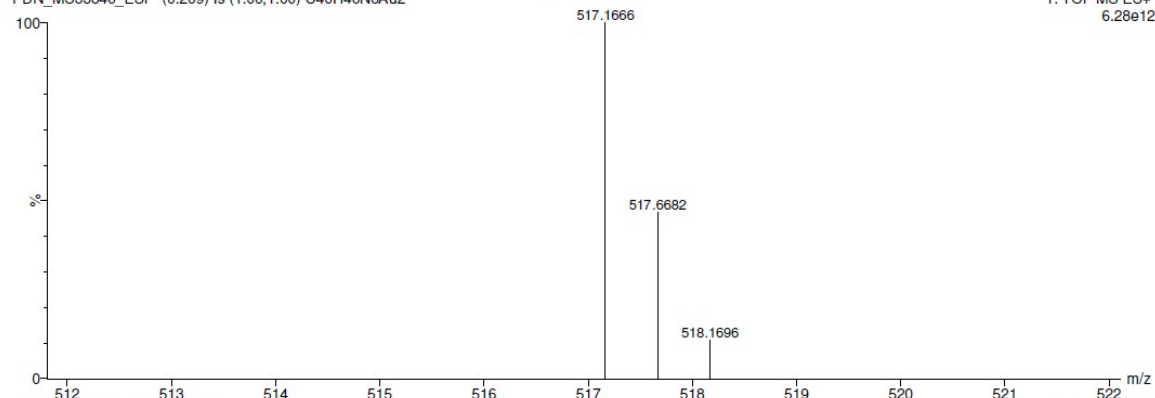

PDN\_MS33846\_ESP 10 (0.225)

1: TOF MS ES+  
6.53e5

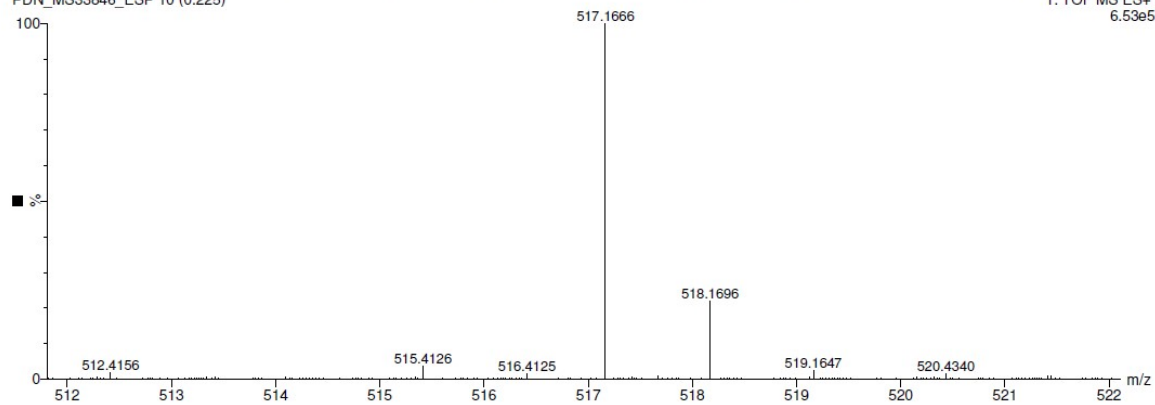

## Theoretical details

All DFT calculations were performed in the Gaussian09 suite (rev D.01). PBE0/SDD-6-31G(d) was selected as the optimum method for further study based on comparison with the X-ray structure of **2a** (see below). All compounds were fully optimized without symmetry constraints, and confirmed as minima by harmonic frequency calculation. Relaxed potential energy scan of **2a** along Ag-Au used 50 steps of 0.1 Å starting from the optimized geometry. Hypothetical homo-metallic dimers were constructed from the optimized geometry of **2a** and fully optimized at the same level. Atoms in Molecules analysis used the AIMAll package.

Comparison of selected geometrical details, all with SDD basis/ECP on Ag and Au, 6-31G(d) on all remaining atoms

|        | Ag-Au | Ag-C  | C-Ag-C | Ag-N         |
|--------|-------|-------|--------|--------------|
| M06-2X | 3.015 | 2.088 | 166.9  | 2.351, 2.557 |
| PBE0   | 2.896 | 2.068 | 175.5  | 2.299, 2.501 |
| PBE0-D | 2.970 | 2.065 | 164.3  | 2.266, 2.476 |

Total energies of hetero- and homo-metallic dimers (au)

|       |              |
|-------|--------------|
| Au-Ag | -2270.710317 |
| Au-Cu | -2321.041941 |
| Au-Au | -2259.472652 |
| Ag-Ag | -2281.899856 |
| Cu-Cu | -2382.570095 |
| Ag-Cu | -2332.234772 |

Relative energies of hetero- and homo-metallic dimers (kJ mol<sup>-1</sup>)

|         |               |        |
|---------|---------------|--------|
| 2*Au-Ag | Au-Au + Ag-Ag | -63.18 |
| 2*Au-Cu | Au-Au + Cu-Cu | -54.00 |
| 2*Ag-Cu | Ag-Ag + Cu-Cu | +0.53  |

Electron density at selected bond critical points in **2a** (au)

|        |                |
|--------|----------------|
| Ag-Au  | 0.0228         |
| Ag-C   | 0.1229         |
| Ag-N   | 0.0514, 0.0335 |
| Au...N | 0.0142         |

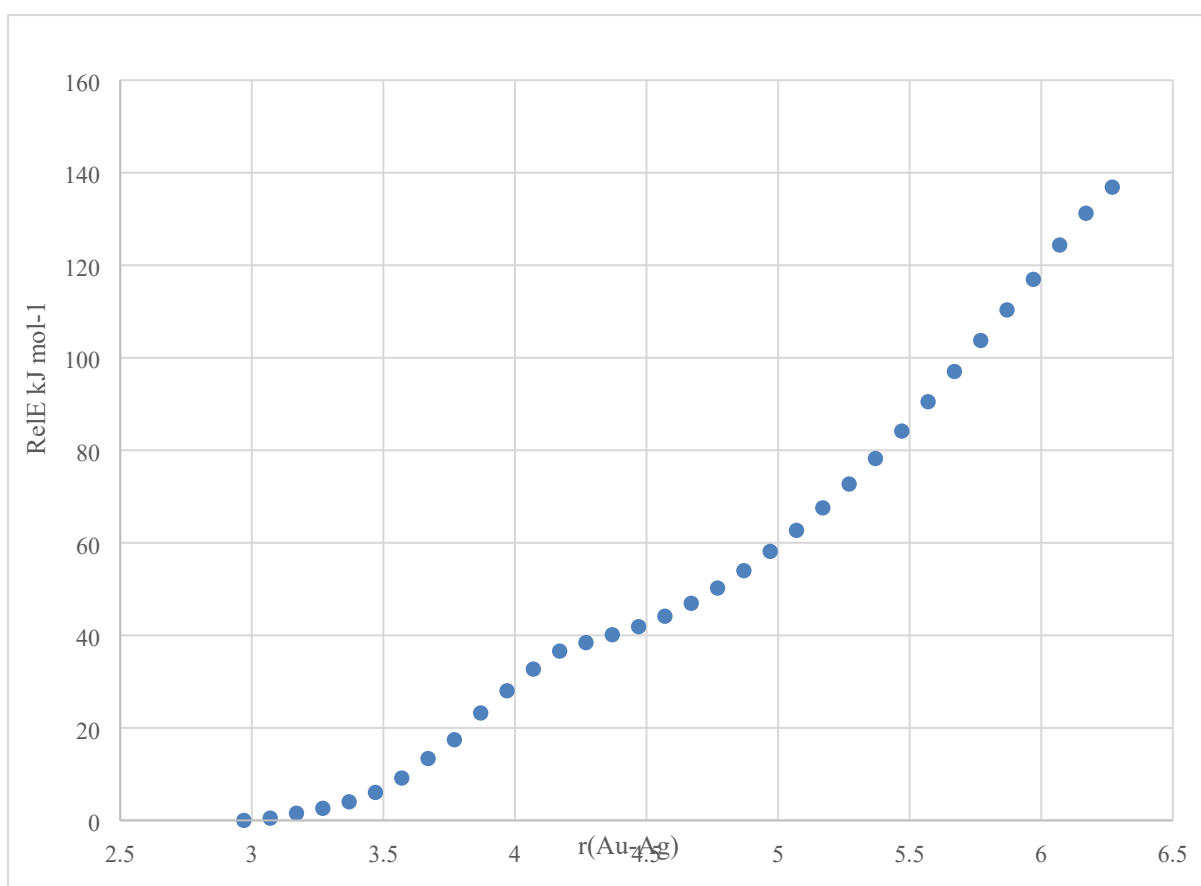



## **Crystallographic data.**

### **Crystal structure determination**

Single-crystal XRD data were collected on an Agilent SupaNova Dual Atlas diffractometer with a mirror monochromator using either Cu ( $\lambda = 1.5418 \text{ \AA}$ ) or Mo ( $\lambda = 0.7107 \text{ \AA}$ ) radiation. Sample temperature was controlled using an Oxford Cryosystems cooling apparatus. Crystal structures were solved and refined using SHELXS and refined using SHELXL.<sup>1</sup> Non-hydrogen atoms were refined with anisotropic displacement parameters. Hydrogen atoms were inserted in idealized positions, and a riding model was used with Uiso set at 1.2 or 1.5 times the value of Ueq for the atom to which they are bonded.

Table S1. Crystal data and structure refinement for **2** (pdn1903b), and **4** (pdn2002)

| Compound (Identification code)                | <b>2a</b> (pdn1903b)                                                                | <b>3</b> (pdn2002)                                                                              |
|-----------------------------------------------|-------------------------------------------------------------------------------------|-------------------------------------------------------------------------------------------------|
| CCDC reference                                | 2106666                                                                             | 2106665                                                                                         |
| Empirical formula                             | C <sub>40</sub> H <sub>47.5</sub> B <sub>2</sub> F <sub>8</sub> N <sub>8</sub> AgAu | C <sub>47</sub> H <sub>60</sub> Au <sub>2</sub> BF <sub>7</sub> N <sub>8</sub> O <sub>5</sub> S |
| Formula weight                                | 1118.81                                                                             | 1386.83                                                                                         |
| Temperature /K                                | 200(2)                                                                              | 293(2)                                                                                          |
| Wavelength /Å                                 | 0.71073                                                                             | 0.71073                                                                                         |
| Crystal system                                | Monoclinic                                                                          | Triclinic                                                                                       |
| Space group                                   | P2 <sub>1</sub>                                                                     | P <sub>1</sub>                                                                                  |
| a/Å                                           | 12.5502(6)                                                                          | 9.2214(3)                                                                                       |
| b/Å                                           | 26.5936(6)                                                                          | 11.7385(4)                                                                                      |
| c/Å                                           | 13.7021(5)                                                                          | 13.0330(4)                                                                                      |
| α/°                                           | 90                                                                                  | 72.325(3)                                                                                       |
| β/°                                           | 114.813(5)                                                                          | 75.768(3)                                                                                       |
| γ/°                                           | 90                                                                                  | 86.988(3)                                                                                       |
| Volume/Å <sup>3</sup>                         | 4151.0(3)                                                                           | 1302.54(8)                                                                                      |
| Z                                             | 4                                                                                   | 1                                                                                               |
| Density (calculated)/ Mgm <sup>-3</sup>       | 1.790                                                                               | 1.768                                                                                           |
| Absorption coefficient/ mm <sup>-1</sup>      | 4.079                                                                               | 5.742                                                                                           |
| S1Crystal size/ mm <sup>3</sup>               | 0.520 x 0.257 x 0.053                                                               | 0.229 x 0.173 x 0.154                                                                           |
| Reflections collected                         | 19872                                                                               | 12209                                                                                           |
| Independent reflections                       | 17003                                                                               | 10912                                                                                           |
| R(int)                                        | 0.0392                                                                              | 0.0349                                                                                          |
| Data / restraints / parameters                | 19872 / 235 / 1143                                                                  | 12209 / 153 / 691                                                                               |
| Goodness-of-fit on F <sup>2</sup>             | 1.040                                                                               | 1.023                                                                                           |
| R1, wR2 [I>2σ(I)]                             | 0.0397, 0.0833                                                                      | 0.0330, 0.0623                                                                                  |
| R1, wR2 (all data)                            | 0.0519, 0.0821                                                                      | 0.0407, 0.0663                                                                                  |
| Absolute structure parameter                  | -0.005(4)                                                                           | -0.012(5)                                                                                       |
| Largest diff. peak and hole e.Å <sup>-3</sup> | 1.468 and -1.781                                                                    | 0.937 and -0.859                                                                                |



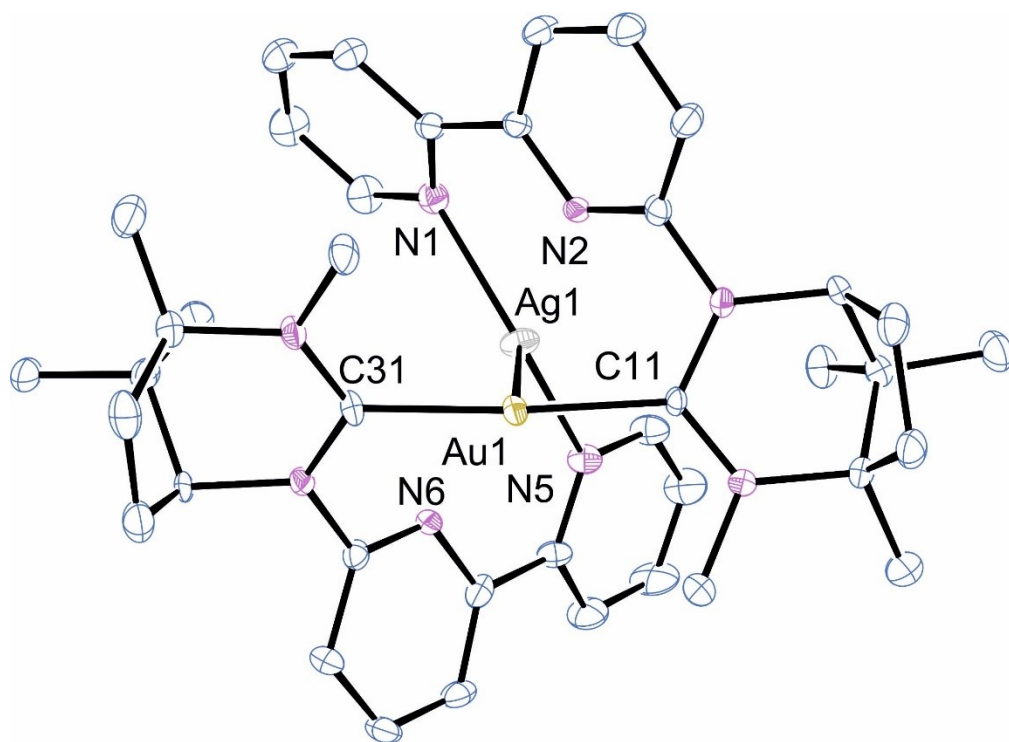

Fig 1: A 30% probability Ortep<sup>3</sup> representation of complex 2 with hydrogen atoms, solvent molecules and counterion omitted.

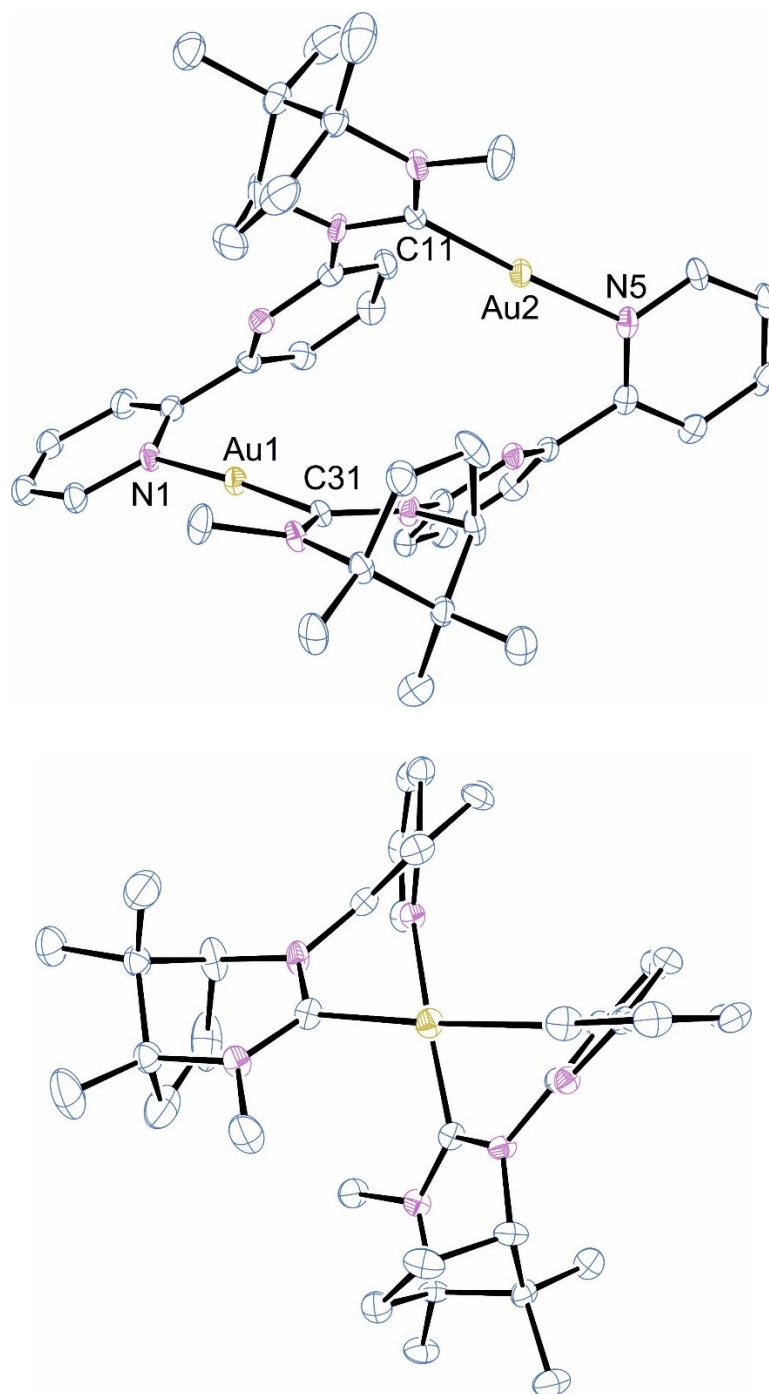

Figure 2: Two Ortep<sup>3</sup> views of the complex cation **4** (the lower one viewed down the Au-Au axis) at 30% probability with hydrogen atoms, solvent molecules and counterion omitted for clarity.

## References

- 1) Sheldrick, G. M. A short history of SHELX *Acta Crystallogr. A* 2008, **64**, 112-122.
- 2) M. Uzarewicz-Baig, M. Koppenwallner, S. Tabassum and R. Wilhelm, *Appl. Organometal. Chem.*, 2014, **28**, 552-558.

3) L. J. Farrugia, *J. Appl. Cryst.* 2012, **45**, 849-854.
